# Supplementary material for: Adverse events after colonoscopy in a randomised colorectal cancer screening trial
Source: PubMed Central journal article supplement — BMJ Open Gastroenterol. 2024 Oct 7;11(1):e001471. doi: 10.1136/bmjgast-2024-001471 (PMC11459295; doi:10.1136/bmjgast-2024-001471), 2024-10-07

## SUPPLEMENTARY TABLES

**Supplementary Table S1.** Attribution of adverse event to colonoscopy according to ASGE lexicon.

|                                         | Unlikely | Possible | Probable | Definite | Total | Events per<br>1000<br>persons |
|-----------------------------------------|----------|----------|----------|----------|-------|-------------------------------|
|                                         | N=119    | N=19     | N=27     | N=196    | N=361 | N=10 244                      |
| Cardiovascular                          |          |          |          |          | 36    | 3.5                           |
| Arrythmia                               | 14       | 2        | 0        | 0        |       |                               |
| Arrest                                  | 0        | 0        | 1        | 0        |       |                               |
| Myocardial infarction                   | 3        | 0        | 1        | 0        |       |                               |
| Cerebrovascular event                   | 1        | 2        | 1        | 0        |       |                               |
| Congestive heart failure                | 9        | 1        | 1        | 0        |       |                               |
| Pulmonary                               |          |          |          |          | 7     | 0.7                           |
| Hypoxia                                 | 1        | 0        | 0        | 1        |       |                               |
| Pneumonia                               | 4        | 0        | 0        | 0        |       |                               |
| COPD exacerbation                       | 1        | 0        | 0        | 0        |       |                               |
| Thromboembolic                          |          |          |          |          | 5     | 0.5                           |
| DVT                                     | 1        | 0        | 0        | 0        |       |                               |
| Pulmonary embolus                       | 3        | 1        | 0        | 0        |       |                               |
| Instrumental                            |          |          |          |          | 8     | 0.8                           |
| Perforation                             | 0        | 0        | 0        | 8        |       |                               |
| Bleeding                                |          |          |          |          | 92    | 9.0                           |
| Lower GI bleeding                       | 2        | 1        | 11       | 76       |       |                               |
| Other intraabdominal<br>bleeding        | 2        | 0        | 0        | 0        |       |                               |
| Infection                               |          |          |          |          | 14    | 1.4                           |
| Urinary tract infection                 | 2        | 1        | 0        | 0        |       |                               |
| Fever other known cause                 | 6        | 2        | 0        | 0        |       |                               |
| Fever unknown cause                     | 0        | 1        | 2        | 0        |       |                               |
| Drug reactions                          |          |          |          |          | 3     | 0.3                           |
| Side effects                            | 0        | 0        | 0        | 3        |       |                               |
| Pain                                    |          |          |          |          | 92    | 9.0                           |
| Postpolypectomy syndrome                | 0        | 0        | 1        | 19       |       |                               |
| Abdominal pain                          | 2        | 4        | 6        | 39       |       |                               |
| Kidney stone                            | 3        | 0        | 0        | 0        |       |                               |
| Gall stone                              | 2        | 0        | 0        | 0        |       |                               |
| Nonabdominal pain                       | 2        | 0        | 1        | 0        |       |                               |
| Chest pain                              | 9        | 1        | 0        | 0        |       |                               |
| Headache                                | 3        | 0        | 0        | 0        |       |                               |
| Integument*                             |          |          |          |          | 21    |                               |
| Bone fracture                           | 12       | 0        | 0        | 0        |       |                               |
| Other integument                        | 9        | 0        | 0        | 0        |       |                               |
| Other                                   |          |          |          |          | 83    | 8.1                           |
| Electrolyte imbalance or<br>dehydration | 4        | 2        | 1        | 1        |       |                               |

|                     |    |   |   |    |
|---------------------|----|---|---|----|
| Syncope             | 1  | 0 | 0 | 0  |
| Vasovagal reaction  | 0  | 0 | 0 | 40 |
| Constipation        | 0  | 0 | 1 | 0  |
| Nausea              | 0  | 1 | 0 | 6  |
| Preexisting cancer  | 4  | 0 | 0 | 0  |
| Other not specified | 19 | 0 | 0 | 3  |

COPD: Chronic obstructive pulmonary disease. DVT: Deep venous thrombosis. GI: Gastrointestinal.

\* Integument category includes damage to skin, eyes, bones, and muscles.(17)

**Supplementary Table S2.** Baseline characteristics per colonoscopy and association with the occurrence of adverse events

|                                    | <b>Total<br/>(col %)</b> | <b>Adverse<br/>events<br/>(row %)</b> | <b>p-<br/>value</b> | <b>Moderate, severe,<br/>or fatal adverse<br/>events<br/>(row %)</b> | <b>p-<br/>value</b> |
|------------------------------------|--------------------------|---------------------------------------|---------------------|----------------------------------------------------------------------|---------------------|
| Total                              | 11,206 (100%)            | 250 (2.2%)                            |                     | 54 (0.5%)                                                            |                     |
| Age                                |                          |                                       | <0.01 <sup>c</sup>  |                                                                      | <0.01 <sup>c</sup>  |
| 50-55                              | 924 (8.2%)               | 8 (0.9%)                              |                     | 0 (0.0%)                                                             |                     |
| 56-60                              | 2,138 (19.1%)            | 39 (1.8%)                             |                     | 7 (0.3%)                                                             |                     |
| 61-65                              | 2,404 (21.5%)            | 51 (2.1%)                             |                     | 11 (0.5%)                                                            |                     |
| 66-70                              | 2,906 (25.9%)            | 63 (2.2%)                             |                     | 13 (0.4%)                                                            |                     |
| >70                                | 2,834 (25.3%)            | 89 (3.1%)                             |                     | 23 (0.8%)                                                            |                     |
| Sex                                |                          |                                       | 0.15 <sup>c</sup>   |                                                                      | 0.46 <sup>c</sup>   |
| Female                             | 4,710 (42.0%)            | 117 (2.5%)                            |                     | 20 (0.4%)                                                            |                     |
| Male                               | 6,496 (58.0%)            | 133 (2.0%)                            |                     | 34 (0.5%)                                                            |                     |
| Screening group                    |                          |                                       | 0.08 <sup>c</sup>   |                                                                      | 0.65 <sup>c</sup>   |
| FIT                                | 7,564 (67.5%)            | 156 (2.1%)                            |                     | 38 (0.5%)                                                            |                     |
| Sigmoidoscopy                      | 3,642 (32.5%)            | 94 (2.6%)                             |                     | 16 (0.4%)                                                            |                     |
| Screening centre                   |                          |                                       | <0.01 <sup>c</sup>  |                                                                      | 0.02 <sup>c</sup>   |
| 1                                  | 5,996 (53.5%)            | 110 (1.8%)                            |                     | 20 (0.3%)                                                            |                     |
| 2                                  | 5,210 (46.5%)            | 140 (2.7%)                            |                     | 34 (0.7%)                                                            |                     |
| Polypectomies per colonoscopy, n   |                          |                                       | <0.01 <sup>c</sup>  |                                                                      | <0.01 <sup>c</sup>  |
| 0                                  | 3,986 (35.6%)            | 52 (1.3%)                             |                     | 5 (0.1%)                                                             |                     |
| 1                                  | 2,849 (25.4%)            | 61 (2.1%)                             |                     | 13 (0.5%)                                                            |                     |
| 2                                  | 1,729 (15.4%)            | 38 (2.2%)                             |                     | 8 (0.5%)                                                             |                     |
| 3                                  | 984 (8.8%)               | 23 (2.3%)                             |                     | 7 (0.7%)                                                             |                     |
| 4                                  | 582 (5.2%)               | 20 (3.4%)                             |                     | 6 (1.0%)                                                             |                     |
| ≥5                                 | 1,076 (9.6%)             | 56 (5.2%)                             |                     | 15 (1.4%)                                                            |                     |
| Max diameter of removed lesion, mm |                          |                                       | <0.01 <sup>c</sup>  |                                                                      | <0.01 <sup>c</sup>  |
| No lesion removed                  | 2,900 (25.9%)            | 47 (1.6%)                             |                     | 4 (0.1%)                                                             |                     |
| 1-5 mm                             | 2,709 (24.2%)            | 24 (0.9%)                             |                     | 5 (0.2%)                                                             |                     |
| 6-10 mm                            | 2,871 (25.6%)            | 56 (2.0%)                             |                     | 16 (0.6%)                                                            |                     |
| 11-20 mm                           | 2,164 (19.3%)            | 86 (4.0%)                             |                     | 18 (0.8%)                                                            |                     |
| >20 mm                             | 562 (5.0%)               | 37 (6.6%)                             |                     | 11 (2.0%)                                                            |                     |
| Serrated lesion                    |                          |                                       | <0.01 <sup>c</sup>  |                                                                      | 0.01 <sup>c</sup>   |
| No                                 | 7,314 (65.3%)            | 139 (1.9%)                            |                     | 26 (0.4%)                                                            |                     |
| Yes                                | 3,892 (34.7%)            | 111 (2.9%)                            |                     | 28 (0.7%)                                                            |                     |
| Adenoma                            |                          |                                       | 0.01 <sup>c</sup>   |                                                                      | <0.01 <sup>c</sup>  |
| No                                 | 4,243 (37.9%)            | 75 (1.8%)                             |                     | 7 (0.2%)                                                             |                     |
| Yes                                | 6,963 (62.1%)            | 175 (2.5%)                            |                     | 47 (0.7%)                                                            |                     |
| Adenocarcinoma                     |                          |                                       | 0.06 <sup>c</sup>   |                                                                      | 0.28 <sup>c</sup>   |
| No                                 | 10,716 (95.6%)           | 233 (2.2%)                            |                     | 50 (0.5%)                                                            |                     |
| Yes                                | 490 (4.4%)               | 17 (3.5%)                             |                     | 4 (0.8%)                                                             |                     |
| Distal lesion                      |                          |                                       | 0.05 <sup>c</sup>   |                                                                      | 0.31 <sup>c</sup>   |
| No                                 | 4,492 (40.1%)            | 115 (2.6%)                            |                     | 18 (0.4%)                                                            |                     |
| Yes                                | 6,714 (59.9%)            | 135 (2.0%)                            |                     | 36 (0.5%)                                                            |                     |
| Proximal lesion                    |                          |                                       | <0.01 <sup>c</sup>  |                                                                      | <0.01 <sup>c</sup>  |

|                                      |                |            |                    |           |                    |
|--------------------------------------|----------------|------------|--------------------|-----------|--------------------|
| No                                   | 6,038 (53.9%)  | 91 (1.5%)  |                    | 13 (0.2%) |                    |
| Yes                                  | 5,168 (46.1%)  | 159 (3.1%) |                    | 41 (0.8%) |                    |
| Bowel cleansing quality <sup>a</sup> |                |            | 0.74 <sup>c</sup>  |           | 0.69 <sup>c</sup>  |
| Good                                 | 8,001 (71.4%)  | 176 (2.2%) |                    | 40 (0.5%) |                    |
| Acceptable                           | 2,189 (19.5%)  | 48 (2.2%)  |                    | 8 (0.4%)  |                    |
| Partly poor                          | 639 (5.7%)     | 13 (2.0%)  |                    | 3 (0.5%)  |                    |
| Poor                                 | 188 (1.7%)     | 6 (3.2%)   |                    | 1 (0.5%)  |                    |
| Coronary heart disease <sup>b</sup>  |                |            | <0.01 <sup>c</sup> |           | <0.01 <sup>c</sup> |
| No                                   | 9,506 (84.8%)  | 191 (2.0%) |                    | 38 (0.4%) |                    |
| Yes                                  | 1,505 (13.4%)  | 52 (3.5%)  |                    | 15 (1.0%) |                    |
| Cerebrovascular disease <sup>b</sup> |                |            | 0.26 <sup>c</sup>  |           | 0.15 <sup>c</sup>  |
| No                                   | 10,455 (93.3%) | 227 (2.2%) |                    | 48 (0.5%) |                    |
| Yes                                  | 556 (5.0%)     | 16 (2.9%)  |                    | 5 (0.9%)  |                    |
| Diabetes <sup>b</sup>                |                |            | 0.25 <sup>c</sup>  |           | 0.42 <sup>c</sup>  |
| No                                   | 10,103 (90.2%) | 217 (2.1%) |                    | 47 (0.5%) |                    |
| Yes                                  | 908 (8.1%)     | 26 (2.9%)  |                    | 6 (0.7%)  |                    |
| Antiplatelet <sup>b</sup>            |                |            | 0.06 <sup>c</sup>  |           | 0.31 <sup>c</sup>  |
| No                                   | 8,726 (77.9%)  | 181 (2.1%) |                    | 39 (0.4%) |                    |
| Yes                                  | 2,285 (20.4%)  | 62 (2.7%)  |                    | 14 (0.6%) |                    |
| Anticoagulant <sup>b</sup>           |                |            | <0.01 <sup>c</sup> |           | <0.01 <sup>c</sup> |
| No                                   | 9,968 (89.0%)  | 205 (2.1%) |                    | 39 (0.4%) |                    |
| Yes                                  | 1,043 (9.3%)   | 38 (3.6%)  |                    | 14 (1.3%) |                    |

<sup>a</sup> Missing value for each variable: 189

<sup>b</sup> Missing value for each variable: 195

<sup>c</sup> Univariable logistic regression clustered on individual level

**Supplementary Table S3.** Severity of diagnoses possible, probable, or definite attributed to the colonoscopy.

|                                      | Mild  | Moderate | Severe | Fatal | Total | Events per person (‰) |
|--------------------------------------|-------|----------|--------|-------|-------|-----------------------|
|                                      | N=188 | N=50     | N=3    | N=1   | N=242 | N=10 244              |
| Cardiovascular                       |       |          |        |       | 9     | 0.9                   |
| Arrythmia                            | 2     | 0        | 0      | 0     |       |                       |
| Arrest                               | 0     | 0        | 0      | 1     |       |                       |
| Myocardial infarction                | 0     | 1        | 0      | 0     |       |                       |
| Cerebrovascular event                | 1     | 1        | 1      | 0     |       |                       |
| Other cardiovascular                 | 2     | 0        | 0      | 0     |       |                       |
| Pulmonary                            |       |          |        |       | 1     | 0.1                   |
| Hypoxia                              | 1     | 0        | 0      | 0     |       |                       |
| Thromboembolic                       |       |          |        |       | 1     | 0.1                   |
| Pulmonary embolus                    | 1     | 0        | 0      | 0     |       |                       |
| Instrumental                         |       |          |        |       | 8     | 0.8                   |
| Perforation                          | 4     | 3        | 1      | 0     |       |                       |
| Bleeding                             |       |          |        |       | 88    | 8.6                   |
| Lower GI bleeding                    | 48    | 40       | 0      | 0     |       |                       |
| Infection                            |       |          |        |       | 6     | 0.6                   |
| Urinary tract infection              | 0     | 1        | 0      | 0     |       |                       |
| Fever other known cause              | 0     | 1        | 1      | 0     |       |                       |
| Fever unknown cause                  | 3     | 0        | 0      | 0     |       |                       |
| Drug reactions                       |       |          |        |       | 3     | 0.3                   |
| Side effects                         | 3     | 0        | 0      | 0     |       |                       |
| Pain                                 |       |          |        |       | 71    | 6.9                   |
| Postpolypectomy syndrome             | 18    | 2        | 0      | 0     |       |                       |
| Abdominal pain                       | 49    | 0        | 0      | 0     |       |                       |
| Nonabdominal pain                    | 1     | 0        | 0      | 0     |       |                       |
| Chest pain                           | 1     | 0        | 0      | 0     |       |                       |
| Other                                |       |          |        |       | 55    | 5.4                   |
| Electrolyte imbalance or dehydration | 3     | 1        | 0      | 0     |       |                       |
| Vasovagal reaction                   | 40    | 0        | 0      | 0     |       |                       |
| Constipation                         | 1     | 0        | 0      | 0     |       |                       |
| Nausea                               | 7     | 0        | 0      | 0     |       |                       |
| Other not specified                  | 3     | 0        | 0      | 0     |       |                       |

GI: Gastrointestinal.

**Supplementary Table S4.** Multivariable logistic regression models of risk factors for adverse events.

One model for any adverse event and one model for moderate, severe, or fatal adverse event.

Complete-case analysis (n = 10,071).

| Outcome                            | Any adverse event   | Moderate, severe, or fatal adverse event |
|------------------------------------|---------------------|------------------------------------------|
| Variable<br>Category               | Odds ratio (95% CI) | Odds ratio (95% CI)                      |
| Age                                |                     |                                          |
| 50-55 years                        | Reference           | Reference                                |
| Every five-year increase           | 1.15 (1.03 - 1.29)  | 1.31 (1.03 - 1.67)                       |
| Sex                                |                     |                                          |
| Male                               | Reference           |                                          |
| Female                             | 1.60 (1.22 - 2.11)  |                                          |
| Screening centre                   |                     |                                          |
| 1                                  | Reference           | Reference                                |
| 2                                  | 1.34 (1.03 - 1.76)  | 1.76 (0.99 - 3.11)                       |
| Number of polypectomies            |                     |                                          |
| No polypectomy                     | Reference           | Reference                                |
| Every additional polypectomy       | 1.06 (1.03 - 1.09)  | 1.04 (1.01 - 1.07)                       |
| Maximum diameter of removed lesion |                     |                                          |
| No lesion removed                  | Reference           | Reference                                |
| Every five mm increase             | 1.29 (1.22 - 1.38)  | 1.35 (1.23 - 1.49)                       |
| Serrated lesion                    |                     |                                          |
| No                                 | Reference           |                                          |
| Yes                                | 1.22 (0.91 - 1.63)  |                                          |
| Adenocarcinoma                     |                     |                                          |
| No                                 | Reference           |                                          |
| Yes                                | 1.59 (0.98 - 2.58)  |                                          |
| Proximal lesion                    |                     |                                          |
| No                                 | Reference           | Reference                                |
| Yes                                | 1.68 (1.21 - 2.32)  | 2.35 (1.17 - 4.70)                       |
| Coronary heart disease             |                     |                                          |
| No                                 | Reference           |                                          |
| Yes                                | 1.43 (0.96 - 2.11)  |                                          |
| Antiplatelet therapy               |                     |                                          |
| No                                 | Reference           | Reference                                |
| Yes                                | 1.38 (0.99 - 1.94)  | 1.52 (0.80 - 2.87)                       |
| Anticoagulant therapy              |                     |                                          |
| No                                 | Reference           | Reference                                |
| Yes                                | 1.87 (1.21 - 2.88)  | 3.73 (1.92 - 7.22)                       |

Covariates selected after backward stepwise selection approach for any adverse event and Moderate, severe, or fatal adverse event.

**Supplementary Table S5.** Baseline characteristics by centre per colonoscopy.

|                                    | <b>Total<br/>N=11,206</b> | <b>Centre 1<br/>N=5,996</b> | <b>Centre 2<br/>N=5,210</b> | <b>p-value<sup>a</sup></b> |
|------------------------------------|---------------------------|-----------------------------|-----------------------------|----------------------------|
| Age                                |                           |                             |                             | <0.01                      |
| 50-55                              | 924 (8.2%)                | 436 (7.3%)                  | 488 (9.4%)                  |                            |
| 56-60                              | 2,138 (19.1%)             | 1,096 (18.3%)               | 1,042 (20.0%)               |                            |
| 61-65                              | 2,404 (21.5%)             | 1,309 (21.8%)               | 1,095 (21.0%)               |                            |
| 66-70                              | 2,906 (25.9%)             | 1,672 (27.9%)               | 1,234 (23.7%)               |                            |
| >70                                | 2,834 (25.3%)             | 1,483 (24.7%)               | 1,351 (25.9%)               |                            |
| Sex                                |                           |                             |                             | 0.03                       |
| Female                             | 4,710 (42.0%)             | 2,577 (43.0%)               | 2,133 (40.9%)               |                            |
| Male                               | 6,496 (58.0%)             | 3,419 (57.0%)               | 3,077 (59.1%)               |                            |
| Screening group                    |                           |                             |                             | <0.01                      |
| FIT                                | 7,564 (67.5%)             | 4,179 (69.7%)               | 3,385 (65.0%)               |                            |
| Sigmoidoscopy                      | 3,642 (32.5%)             | 1,817 (30.3%)               | 1,825 (35.0%)               |                            |
| Polypectomies per colonoscopy, n   |                           |                             |                             | <0.01                      |
| 0                                  | 3,986 (35.6%)             | 2,233 (37.2%)               | 1,753 (33.6%)               |                            |
| 1                                  | 2,849 (25.4%)             | 1,526 (25.5%)               | 1,323 (25.4%)               |                            |
| 2                                  | 1,729 (15.4%)             | 885 (14.8%)                 | 844 (16.2%)                 |                            |
| 3                                  | 984 (8.8%)                | 496 (8.3%)                  | 488 (9.4%)                  |                            |
| 4                                  | 582 (5.2%)                | 285 (4.8%)                  | 297 (5.7%)                  |                            |
| ≥5                                 | 1,076 (9.6%)              | 571 (9.5%)                  | 505 (9.7%)                  |                            |
| Max diameter of removed lesion, mm |                           |                             |                             | <0.01                      |
| No lesion removed                  | 2,900 (25.9%)             | 1,667 (27.8%)               | 1,233 (23.7%)               |                            |
| 1-5 mm                             | 2,709 (24.2%)             | 1,435 (23.9%)               | 1,274 (24.5%)               |                            |
| 6-10 mm                            | 2,871 (25.6%)             | 1,557 (26.0%)               | 1,314 (25.2%)               |                            |
| 11-20 mm                           | 2,164 (19.3%)             | 1,084 (18.1%)               | 1,080 (20.7%)               |                            |
| >20 mm                             | 562 (5.0%)                | 253 (4.2%)                  | 309 (5.9%)                  |                            |
| Clip for periprocedural bleeding   |                           |                             |                             | 0.33                       |
| No                                 | 10,666 (95.2%)            | 5,696 (95.0%)               | 4,970 (95.4%)               |                            |
| Yes                                | 540 (4.8%)                | 300 (5.0%)                  | 240 (4.6%)                  |                            |
| Serrated lesion                    |                           |                             |                             | <0.01                      |
| No                                 | 7,314 (65.3%)             | 4,108 (68.5%)               | 3,206 (61.5%)               |                            |
| Yes                                | 3,892 (34.7%)             | 1,888 (31.5%)               | 2,004 (38.5%)               |                            |
| Adenoma                            |                           |                             |                             | <0.01                      |
| No                                 | 4,243 (37.9%)             | 2,345 (39.1%)               | 1,898 (36.4%)               |                            |
| Yes                                | 6,963 (62.1%)             | 3,651 (60.9%)               | 3,312 (63.6%)               |                            |
| Adenocarcinoma                     |                           |                             |                             | 0.24                       |
| No                                 | 10,716 (95.6%)            | 5,721 (95.4%)               | 4,995 (95.9%)               |                            |
| Yes                                | 490 (4.4%)                | 275 (4.6%)                  | 215 (4.1%)                  |                            |
| Distal lesion                      |                           |                             |                             | <0.01                      |
| No                                 | 4,492 (40.1%)             | 2,499 (41.7%)               | 1,993 (38.3%)               |                            |
| Yes                                | 6,714 (59.9%)             | 3,497 (58.3%)               | 3,217 (61.7%)               |                            |
| Proximal lesion                    |                           |                             |                             | <0.01                      |
| No                                 | 6,038 (53.9%)             | 3,365 (56.1%)               | 2,673 (51.3%)               |                            |
| Yes                                | 5,168 (46.1%)             | 2,631 (43.9%)               | 2,537 (48.7%)               |                            |
| Bowel cleansing quality            |                           |                             |                             | <0.01                      |
| Good                               | 8,001 (71.4%)             | 4,121 (68.7%)               | 3,880 (74.5%)               |                            |
| Acceptable                         | 2,189 (19.5%)             | 1,225 (20.4%)               | 964 (18.5%)                 |                            |
| Partly poor                        | 639 (5.7%)                | 422 (7.0%)                  | 217 (4.2%)                  |                            |
| Poor                               | 188 (1.7%)                | 101 (1.7%)                  | 87 (1.7%)                   |                            |

|                         |                |               |               |       |
|-------------------------|----------------|---------------|---------------|-------|
| Missing                 | 189 (1.7%)     | 127 (2.1%)    | 62 (1.2%)     |       |
| Coronary heart disease  |                |               |               | 0.35  |
| No                      | 9,506 (84.8%)  | 5,106 (85.2%) | 4,400 (84.5%) |       |
| Yes                     | 1,505 (13.4%)  | 789 (13.2%)   | 716 (13.7%)   |       |
| Missing                 | 195 (1.7%)     | 101 (1.7%)    | 94 (1.8%)     |       |
| Cerebrovascular disease |                |               |               | <0.01 |
| No                      | 10,455 (93.3%) | 5,525 (92.1%) | 4,930 (94.6%) |       |
| Yes                     | 556 (5.0%)     | 370 (6.2%)    | 186 (3.6%)    |       |
| Missing                 | 195 (1.7%)     | 101 (1.7%)    | 94 (1.8%)     |       |
| Diabetes                |                |               |               | <0.01 |
| No                      | 10,103 (90.2%) | 5,302 (88.4%) | 4,801 (92.1%) |       |
| Yes                     | 908 (8.1%)     | 593 (9.9%)    | 315 (6.0%)    |       |
| Missing                 | 195 (1.7%)     | 101 (1.7%)    | 94 (1.8%)     |       |
| Antiplatelet            |                |               |               | <0.01 |
| No                      | 8,726 (77.9%)  | 4,546 (75.8%) | 4,180 (80.2%) |       |
| Yes                     | 2,285 (20.4%)  | 1,349 (22.5%) | 936 (18.0%)   |       |
| Missing                 | 195 (1.7%)     | 101 (1.7%)    | 94 (1.8%)     |       |
| Anticoagulant           |                |               |               | 0.88  |
| No                      | 9,968 (89.0%)  | 5,339 (89.0%) | 4,629 (88.8%) |       |
| Yes                     | 1,043 (9.3%)   | 556 (9.3%)    | 487 (9.3%)    |       |
| Missing                 | 195 (1.7%)     | 101 (1.7%)    | 94 (1.8%)     |       |

<sup>a</sup> Chi-square test.



**Supplementary Figure S1:** Adverse events unlikely attributed to the colonoscopy by days after colonoscopy.

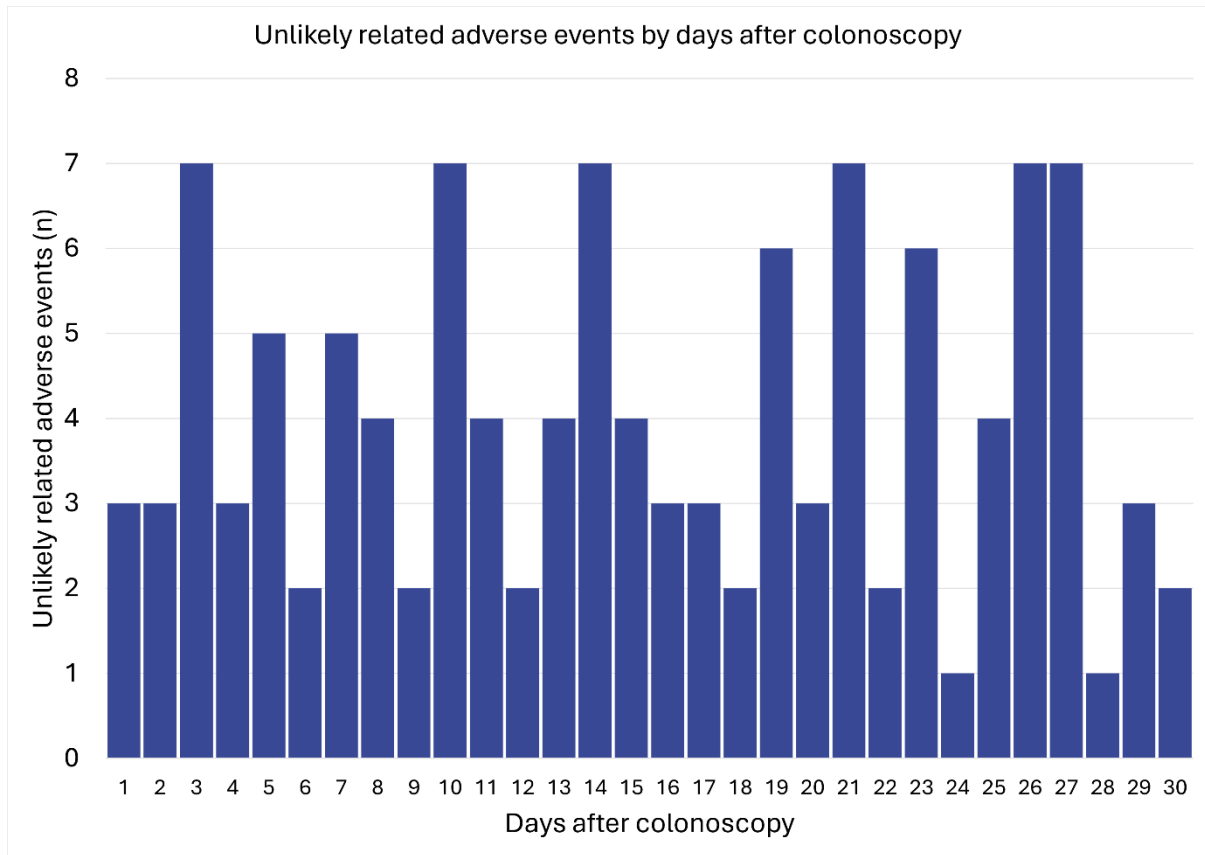

**Supplementary Figure S2:** Admission rate 7, 14, 21, and 30 days after colonoscopy. AE: Adverse event.

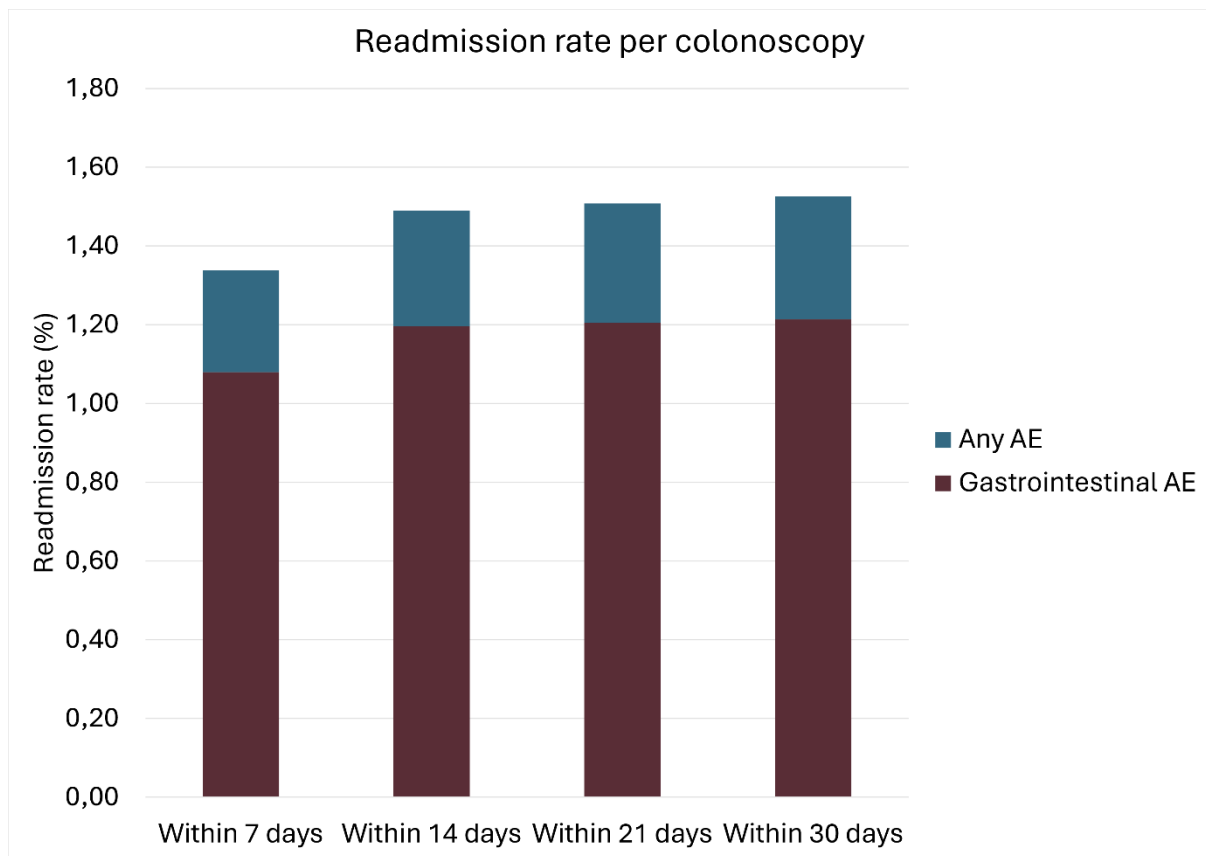

**Supplementary Figure S3:** Adverse event rates by year of colonoscopy and screening centre.

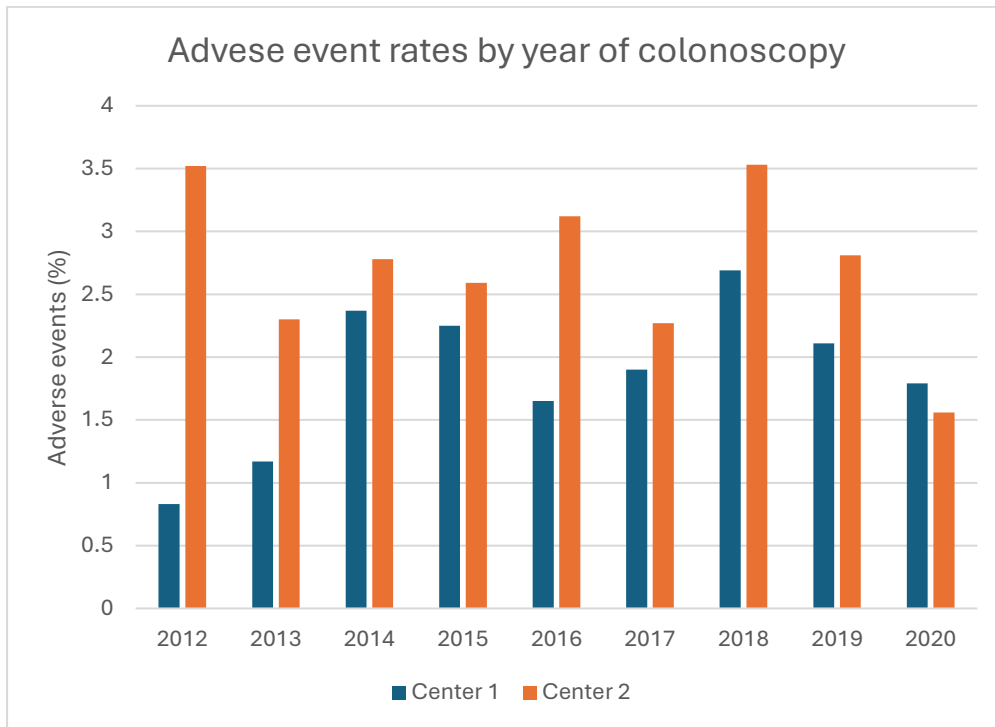

Supplement: bmjgast-11-1-s001.pdf [file bmjgast-11-1-s001.pdf]
